# Supplementary material
Source: publisher figshare collection journal article supplement (https://karger.figshare.com/ndownloader/files/28912980)
Supplement: Supplementary file 1 [file 28912980]

| Transitional status | Primary Maxillary Teeth | | | | | Primary Mandibular Teeth | | | | |
| --- | --- | --- | --- | --- | --- | --- | --- | --- | --- | --- |
| CI | LI | C | 1st M | 2nd M | CI | LI | C | 1st M | 2nd M |
| U - U | **40.5** | **78.3** | **97.3** | **89.2** | **100** | **43.2** | **81** | **100** | **89.2** | **0** |
| U - U | 0 | 41 | 11.5 | 40 | 80 | 0 | 0 | 5 | 17 | 76 |
| U - S | **54** | **20.2** | **2.7** | **10.8** | **0** | **56.8** | **19** | **0** | **10.8** | **0** |
| U - S | 46 | 20 | 70 | 24.2 | 12 | 17 | 28 | 15 | 65 | 24 |
| U - NC | **2.7** | **1.35** | **0** | **0** | **0** | **0** | **0** | **0** | **0** | **0** |
| U - NC | 0 | 0 | 0 | 0 | 0 | 13 | 0 | 0 | 0 | 0 |
| U - Ca | **5** | **0** | **0** | **0** | **0** | **0** | **0** | **0** | **0** | **0** |
| U - Ca | 0 | 0 | 0 | 0 | 0 | 0 | 0 | 0 | 0 | 0 |
| S - S | **0** | **0** | **0** | **0** | **0** | **0** | **0** | **0** | **0** | **0** |
| S - S | 32 | 25 | 12 | 24.2 | 8 | 70 | 65 | 85 | 21.7 | 0 |
| S - NC | **0** | **0** | **0** | **0** | **0** | **0** | **0** | **0** | **0** | **0** |
| S - NC | 7.5 | 5 | 0 | 0 | 0 | 0 | 0 | 0 | 0 | 0 |
| S - Ca | **0** | **0** | **0** | **0** | **0** | **0** | **0** | **0** | **0** | **0** |
| S - Ca | 0 | 0 | 1.5 | 11.5 | 0 | 0 | 0 | 0 | 0 | 0 |
| NC - NC | **0** | **0** | **0** | **0** | **0** | **0** | **0** | **0** | **0** | **0** |
| NC - NC | 7.5 | 0 | 0 | 4 | 0 | 0 | 0 | 0 | 0 | 0 |
| NC - Ca | **0** | **0** | **0** | **0** | **0** | **0** | **0** | **0** | **0** | **0** |
| NC - Ca | 0 | 0 | 0 | 0 | 0 | 0 | 0 | 0 | 0 | 0 |
| Ca - Ca | **0** | **0** | **0** | **0** | **0** | **0** | **0** | **0** | **0** | **0** |
| Ca - Ca | 5 | 0 | 0 | 11.5 | 0 | 0 | 0 | 0 | 0 | 0 |

* U – Unerupted, S – Sound, NC – Non-cavitated, Ca – Cavitated

* CI- Central Incisor, LI- Lateral Incisor, C- Canine, 1st M- First molar, 2nd M- Second Molar

* Text **Bold (U-U)** – First Follow up, Text Unbold (U-U)– Last follow up

**Appendix 1:** Transitional Probability (%) Tooth-Wise at First Follow-up (n= 37) and Last Follow-up (n=33)
